# Supplementary material for: Unravelling the enigma of selective vulnerability in neurodegeneration: motor neurons resistant to degeneration in ALS show distinct gene expression characteristics and decreased susceptibility to excitotoxicity
Source: Acta Neuropathol. 2012 Nov 13;125(1):95–109. doi: 10.1007/s00401-012-1058-5 (PMC3535376; doi:10.1007/s00401-012-1058-5)
Supplement: Supplementary file 5 — Supplementary Table 3 (XLS 100 kb) [file 401_2012_1058_MOESM5_ESM.xls]

## Sheet: Supplementary table 3
Genes with a function in the regulation of transcription, upregulated in spinal motor neurons relative to oculomotor neurons
Gene ontology terms used to identify significantly differentially expressed genes with a function in the regulation of transcription
Category	Term	Count	%	p value	q-value	Genes	Fold Enrichment
GOTERM_BP_FAT	GO:0045893~positive regulation of transcription, DNA-dependent	23	7.77027	1.15e-05	0.000598	201464_X_AT, 239448_AT, 209199_S_AT, 201465_S_AT, 209121_X_AT, 1560798_AT, 202820_AT, 235739_AT, 202949_S_AT, 242558_AT, 228642_AT, 210479_S_AT, 206847_S_AT, 229327_S_AT, 209318_X_AT, 241612_AT, 232882_AT, 239058_AT, 224606_AT, 235753_AT, 209189_AT, 222303_AT, 201693_S_AT, 213342_AT, 1555832_S_AT, 236395_AT, 205290_S_AT	2.93826
GOTERM_BP_FAT	GO:0051254~positive regulation of RNA metabolic process	23	7.77027	1.32e-05	0.000662731	201464_X_AT, 239448_AT, 209199_S_AT, 201465_S_AT, 209121_X_AT, 1560798_AT, 202820_AT, 235739_AT, 202949_S_AT, 242558_AT, 228642_AT, 210479_S_AT, 206847_S_AT, 229327_S_AT, 209318_X_AT, 241612_AT, 232882_AT, 239058_AT, 224606_AT, 235753_AT, 209189_AT, 222303_AT, 201693_S_AT, 213342_AT, 1555832_S_AT, 236395_AT, 205290_S_AT	2.91382
Probe ID	Gene.Title	Gene.Symbol	Fold change	PPLR	q value	Entrez.Gene	Gene.Ontology.Biological.Process	Gene.Ontology.Cellular.Component	Gene.Ontology.Molecular.Function	Alignments
201289_at	cysteine-rich, angiogenic inducer, 61	CYR61	10.4568	1	0	3491	0001558 // regulation of cell growth // inferred from electronic annotation /// 0001569 // patterning of blood vessels // inferred from electronic annotation /// 0006935 // chemotaxis // inferred from electronic annotation /// 0007155 // cell adhesion // inferred from electronic annotation /// 0008283 // cell proliferation // traceable author statement /// 0009653 // anatomical structure morphoge…	0005576 // extracellular region // inferred from electronic annotation	0005515 // protein binding // inferred from electronic annotation /// 0005520 // insulin-like growth factor binding // inferred from electronic annotation /// 0008201 // heparin binding // inferred from electronic annotation /// 0019838 // growth factor binding // inferred from electronic annotation	chr1:85819175-85821974 (+) // 99.84 // p22.3
201465_s_at	jun oncogene	JUN	9.8224	1	0	3725	0006350 // transcription // inferred from electronic annotation /// 0006355 // regulation of transcription, DNA-dependent // inferred from electronic annotation /// 0007179 // transforming growth factor beta receptor signaling pathway // inferred from direct assay /// 0007184 // SMAD protein nuclear translocation // inferred from direct assay /// 0009987 // cellular process // inferred from elect…	0000228 // nuclear chromosome // traceable author statement /// 0005634 // nucleus // inferred from electronic annotation /// 0005667 // transcription factor complex // inferred from electronic annotation /// 0005829 // cytosol // not recorded	0003677 // DNA binding // inferred from electronic annotation /// 0003677 // DNA binding // traceable author statement /// 0003700 // transcription factor activity // traceable author statement /// 0003700 // transcription factor activity // inferred from direct assay /// 0003700 // transcription factor activity // inferred from electronic annotation /// 0003702 // RNA polymerase II transcription…	chr1:59020304-59022276 (-) // 98.5 // p32.1
204779_s_at	homeobox B7	HOXB7	6.20569	1	0	3217	0006350 // transcription // inferred from electronic annotation /// 0006355 // regulation of transcription, DNA-dependent // non-traceable author statement /// 0006355 // regulation of transcription, DNA-dependent // inferred from electronic annotation /// 0007275 // multicellular organismal development // non-traceable author statement /// 0007275 // multicellular organismal development // infer…	0005634 // nucleus // non-traceable author statement /// 0005634 // nucleus // inferred from electronic annotation	0003677 // DNA binding // inferred from electronic annotation /// 0003700 // transcription factor activity // non-traceable author statement /// 0003700 // transcription factor activity // inferred from electronic annotation /// 0005515 // protein binding // inferred from physical interaction /// 0005515 // protein binding // inferred from electronic annotation /// 0030528 // transcription regula…	chr17:44039595-44043378 (-) // 91.46 // q21.32
205453_at	homeobox B2	HOXB2	10.405	1	0	3212	0002011 // morphogenesis of an epithelial sheet // inferred from electronic annotation /// 0006350 // transcription // inferred from electronic annotation /// 0006355 // regulation of transcription, DNA-dependent // inferred from electronic annotation /// 0006355 // regulation of transcription, DNA-dependent // non-traceable author statement /// 0007275 // multicellular organismal development // …	0005634 // nucleus // inferred from electronic annotation /// 0005634 // nucleus // inferred from direct assay	0003677 // DNA binding // inferred from electronic annotation /// 0003677 // DNA binding // inferred from direct assay /// 0003700 // transcription factor activity // inferred from electronic annotation /// 0003700 // transcription factor activity // non-traceable author statement /// 0030528 // transcription regulator activity // inferred from electronic annotation /// 0043565 // sequence-specif…	chr17:43975057-43977340 (-) // 93.29 // q21.32
206194_at	homeobox C4	HOXC4	4.63459	1	0	3221	0001501 // skeletal system development // inferred from electronic annotation /// 0006350 // transcription // inferred from electronic annotation /// 0006355 // regulation of transcription, DNA-dependent // non-traceable author statement /// 0006355 // regulation of transcription, DNA-dependent // inferred from electronic annotation /// 0007275 // multicellular organismal development // non-trace…	0005634 // nucleus // non-traceable author statement /// 0005634 // nucleus // inferred from electronic annotation	0003677 // DNA binding // inferred from electronic annotation /// 0003700 // transcription factor activity // non-traceable author statement /// 0003700 // transcription factor activity // inferred from electronic annotation /// 0030528 // transcription regulator activity // inferred from electronic annotation /// 0043565 // sequence-specific DNA binding // inferred from electronic annotation	chr12:52696981-52736081 (+) // 89.79 // q13.13
206847_s_at	homeobox A7	HOXA7	9.21286	1	0	3204	0000122 // negative regulation of transcription from RNA polymerase II promoter // inferred from direct assay /// 0000122 // negative regulation of transcription from RNA polymerase II promoter // inferred from electronic annotation /// 0006350 // transcription // inferred from electronic annotation /// 0006355 // regulation of transcription, DNA-dependent // inferred from electronic annotation /…	0005634 // nucleus // inferred from electronic annotation	0003677 // DNA binding // inferred from electronic annotation /// 0003700 // transcription factor activity // traceable author statement /// 0003700 // transcription factor activity // inferred from electronic annotation /// 0005515 // protein binding // inferred from electronic annotation /// 0016564 // transcription repressor activity // inferred from electronic annotation /// 0030528 // transc…	chr7:27160924-27162821 (-) // 91.93 // p15.2
206858_s_at	homeobox C6	HOXC6	26.7967	1	0	3223	0001501 // skeletal system development // inferred from electronic annotation /// 0006350 // transcription // inferred from electronic annotation /// 0006355 // regulation of transcription, DNA-dependent // inferred from electronic annotation /// 0006355 // regulation of transcription, DNA-dependent // non-traceable author statement /// 0006357 // regulation of transcription from RNA polymerase I…	0005634 // nucleus // inferred from electronic annotation /// 0005634 // nucleus // non-traceable author statement	0003677 // DNA binding // inferred from electronic annotation /// 0003700 // transcription factor activity // inferred from electronic annotation /// 0003700 // transcription factor activity // non-traceable author statement /// 0003714 // transcription corepressor activity // traceable author statement /// 0030528 // transcription regulator activity // inferred from electronic annotation /// 004…	chr12:52708460-52710787 (+) // 97.45 // q13.13
209687_at	chemokine (C-X-C motif) ligand 12 (stromal cell-derived factor 1)	CXCL12	14.5755	1	0	6387	0001569 // patterning of blood vessels // inferred from electronic annotation /// 0001667 // ameboidal cell migration // inferred from electronic annotation /// 0001764 // neuron migration // inferred from electronic annotation /// 0006874 // cellular calcium ion homeostasis // traceable author statement /// 0006935 // chemotaxis // traceable author statement /// 0006935 // chemotaxis // inferred…	0005576 // extracellular region // inferred from electronic annotation /// 0005615 // extracellular space // inferred from electronic annotation	0004871 // signal transducer activity // traceable author statement /// 0005102 // receptor binding // traceable author statement /// 0005125 // cytokine activity // inferred from electronic annotation /// 0008009 // chemokine activity // traceable author statement /// 0008009 // chemokine activity // inferred from electronic annotation /// 0008083 // growth factor activity // inferred from elect…	chr10:44192586-44200563 (-) // 81.46 // q11.21
213844_at	homeobox A5	HOXA5	9.53693	1	0	3202	0001501 // skeletal system development // inferred from electronic annotation /// 0006350 // transcription // inferred from electronic annotation /// 0006355 // regulation of transcription, DNA-dependent // non-traceable author statement /// 0006355 // regulation of transcription, DNA-dependent // inferred from electronic annotation /// 0007275 // multicellular organismal development // inferred …	0005634 // nucleus // non-traceable author statement /// 0005634 // nucleus // inferred from electronic annotation	0003677 // DNA binding // inferred from electronic annotation /// 0003700 // transcription factor activity // non-traceable author statement /// 0003700 // transcription factor activity // inferred from electronic annotation /// 0030528 // transcription regulator activity // inferred from electronic annotation /// 0043565 // sequence-specific DNA binding // inferred from electronic annotation	chr7:27147212-27149808 (-) // 97.8 // p15.2
216973_s_at	homeobox B7	HOXB7	4.46838	1	0	3217	0006350 // transcription // inferred from electronic annotation /// 0006355 // regulation of transcription, DNA-dependent // non-traceable author statement /// 0006355 // regulation of transcription, DNA-dependent // inferred from electronic annotation /// 0007275 // multicellular organismal development // non-traceable author statement /// 0007275 // multicellular organismal development // infer…	0005634 // nucleus // non-traceable author statement /// 0005634 // nucleus // inferred from electronic annotation	0003677 // DNA binding // inferred from electronic annotation /// 0003700 // transcription factor activity // non-traceable author statement /// 0003700 // transcription factor activity // inferred from electronic annotation /// 0005515 // protein binding // inferred from physical interaction /// 0005515 // protein binding // inferred from electronic annotation /// 0030528 // transcription regula…	chr17:44039732-44042988 (-) // 84.66 // q21.32
223122_s_at	secreted frizzled-related protein 2	SFRP2	4.95499	1	0	6423	0001756 // somitogenesis // inferred from electronic annotation /// 0007275 // multicellular organismal development // inferred from electronic annotation /// 0009952 // anterior/posterior pattern formation // inferred from electronic annotation /// 0016055 // Wnt receptor signaling pathway // inferred from electronic annotation /// 0030154 // cell differentiation // inferred from electronic anno…	0005576 // extracellular region // inferred from electronic annotation /// 0005737 // cytoplasm // inferred from direct assay /// 0005813 // centrosome // inferred from direct assay /// 0005856 // cytoskeleton // inferred from direct assay /// 0005925 // focal adhesion // inferred from direct assay	0005515 // protein binding // inferred from electronic annotation	chr4:154921191-154929674 (-) // 99.85 // q31.3
228642_at			7.51871	1	0					chr7:27102376-27106544 (+) // 95.07 // p15.2
228904_at	homeobox B3	HOXB3	8.30238	1	0	3213	0006350 // transcription // inferred from electronic annotation /// 0006355 // regulation of transcription, DNA-dependent // inferred from electronic annotation /// 0007275 // multicellular organismal development // inferred from electronic annotation /// 0009952 // anterior/posterior pattern formation // inferred from electronic annotation /// 0021615 // glossopharyngeal nerve morphogenesis // i…	0005634 // nucleus // inferred from electronic annotation	0003677 // DNA binding // inferred from electronic annotation /// 0003700 // transcription factor activity // inferred from electronic annotation /// 0030528 // transcription regulator activity // inferred from electronic annotation /// 0043565 // sequence-specific DNA binding // inferred from electronic annotation	chr17:43981145-43982057 (-) // 95.54 // q21.32
231906_at	homeobox D8	HOXD8	4.22593	1	0	3234	0000122 // negative regulation of transcription from RNA polymerase II promoter // inferred from electronic annotation /// 0006355 // regulation of transcription, DNA-dependent // non-traceable author statement /// 0006355 // regulation of transcription, DNA-dependent // inferred from electronic annotation /// 0007275 // multicellular organismal development // inferred from electronic annotation …	0005634 // nucleus // non-traceable author statement /// 0005634 // nucleus // inferred from electronic annotation	0003677 // DNA binding // inferred from electronic annotation /// 0003700 // transcription factor activity // non-traceable author statement /// 0003700 // transcription factor activity // inferred from electronic annotation /// 0030528 // transcription regulator activity // inferred from electronic annotation /// 0043565 // sequence-specific DNA binding // inferred from electronic annotation	chr2:176702675-176705668 (+) // 97.71 // q31.1
235753_at	homeobox A7	HOXA7	6.16337	1	0	3204	0000122 // negative regulation of transcription from RNA polymerase II promoter // inferred from direct assay /// 0000122 // negative regulation of transcription from RNA polymerase II promoter // inferred from electronic annotation /// 0006350 // transcription // inferred from electronic annotation /// 0006355 // regulation of transcription, DNA-dependent // inferred from electronic annotation /…	0005634 // nucleus // inferred from electronic annotation	0003677 // DNA binding // inferred from electronic annotation /// 0003700 // transcription factor activity // traceable author statement /// 0003700 // transcription factor activity // inferred from electronic annotation /// 0005515 // protein binding // inferred from electronic annotation /// 0016564 // transcription repressor activity // inferred from electronic annotation /// 0030528 // transc…	chr7:27159864-27160757 (-) // 93.56 // p15.2
241612_at	forkhead box D3	FOXD3	4.89478	1	0	27022	0000122 // negative regulation of transcription from RNA polymerase II promoter // inferred from sequence or structural similarity /// 0000122 // negative regulation of transcription from RNA polymerase II promoter // inferred from electronic annotation /// 0001701 // in utero embryonic development // inferred from sequence or structural similarity /// 0001829 // trophectodermal cell differentiat…	0005634 // nucleus // inferred from electronic annotation	0003677 // DNA binding // inferred from electronic annotation /// 0003700 // transcription factor activity // inferred from sequence or structural similarity /// 0003700 // transcription factor activity // inferred from electronic annotation /// 0005515 // protein binding // inferred from physical interaction /// 0043565 // sequence-specific DNA binding // inferred from electronic annotation	chr1:63562370-63563385 (+) // 93.78 // p31.3
205522_at	homeobox D4	HOXD4	5.67862	1	1.18952e-16	3233	0006350 // transcription // inferred from electronic annotation /// 0006355 // regulation of transcription, DNA-dependent // non-traceable author statement /// 0006355 // regulation of transcription, DNA-dependent // inferred from electronic annotation /// 0007275 // multicellular organismal development // non-traceable author statement /// 0007275 // multicellular organismal development // infer…	0005634 // nucleus // non-traceable author statement /// 0005634 // nucleus // inferred from electronic annotation	0003677 // DNA binding // inferred from electronic annotation /// 0003700 // transcription factor activity // non-traceable author statement /// 0003700 // transcription factor activity // inferred from electronic annotation /// 0030528 // transcription regulator activity // inferred from electronic annotation /// 0043565 // sequence-specific DNA binding // inferred from electronic annotation	chr2:176723363-176729044 (+) // 97.72 // q31.1
209189_at	v-fos FBJ murine osteosarcoma viral oncogene homolog	FOS	6.72546	1	5.19206e-15	2353	0006306 // DNA methylation // traceable author statement /// 0006355 // regulation of transcription, DNA-dependent // inferred from electronic annotation /// 0006357 // regulation of transcription from RNA polymerase II promoter // traceable author statement /// 0006954 // inflammatory response // traceable author statement /// 0007179 // transforming growth factor beta receptor signaling pathway…	0005634 // nucleus // traceable author statement /// 0005634 // nucleus // inferred from electronic annotation /// 0005667 // transcription factor complex // inferred from electronic annotation	0003677 // DNA binding // inferred from electronic annotation /// 0003690 // double-stranded DNA binding // inferred from electronic annotation /// 0003700 // transcription factor activity // inferred from electronic annotation /// 0003700 // transcription factor activity // inferred from direct assay /// 0003704 // specific RNA polymerase II transcription factor activity // traceable author stat…	chr14:74815311-74818404 (+) // 98.3 // q24.3
239058_at			3.92413	1	8.22953e-15					chr16:85160153-85160729 (+) // 96.53 // q24.1
209199_s_at	myocyte enhancer factor 2C	MEF2C	5.20463	1	1.1612e-14	4208	0006350 // transcription // inferred from electronic annotation /// 0006355 // regulation of transcription, DNA-dependent // inferred from electronic annotation /// 0006915 // apoptosis // inferred from electronic annotation /// 0007275 // multicellular organismal development // inferred from electronic annotation /// 0007399 // nervous system development // traceable author statement /// 0007399…	0005634 // nucleus // inferred from electronic annotation /// 0016607 // nuclear speck // inferred from direct assay	0003677 // DNA binding // inferred from electronic annotation /// 0003700 // transcription factor activity // non-traceable author statement /// 0003700 // transcription factor activity // inferred from electronic annotation /// 0003702 // RNA polymerase II transcription factor activity // traceable author statement /// 0043565 // sequence-specific DNA binding // inferred from electronic annotati…	chr5:88049813-88214780 (-) // 97.25 // q14.3
1555832_s_at	Kruppel-like factor 6	KLF6	3.15483	1	1.5099e-14	1316	0006350 // transcription // inferred from electronic annotation /// 0006355 // regulation of transcription, DNA-dependent // non-traceable author statement /// 0006355 // regulation of transcription, DNA-dependent // inferred from electronic annotation /// 0016049 // cell growth // non-traceable author statement /// 0019221 // cytokine-mediated signaling pathway // inferred from electronic annota…	0005622 // intracellular // inferred from electronic annotation /// 0005634 // nucleus // traceable author statement /// 0005634 // nucleus // inferred from electronic annotation /// 0005737 // cytoplasm // inferred from electronic annotation	0003676 // nucleic acid binding // inferred from electronic annotation /// 0003677 // DNA binding // inferred from electronic annotation /// 0008270 // zinc ion binding // inferred from electronic annotation /// 0016563 // transcription activator activity // traceable author statement /// 0046872 // metal ion binding // inferred from electronic annotation	chr10:3808744-3809474 (-) // 83.85 // p15.1
235521_at	homeobox A3	HOXA3	3.4041	1	3.09229e-14	3200	0001974 // blood vessel remodeling // inferred from electronic annotation /// 0006350 // transcription // inferred from electronic annotation /// 0006355 // regulation of transcription, DNA-dependent // inferred from electronic annotation /// 0007275 // multicellular organismal development // inferred from electronic annotation /// 0008284 // positive regulation of cell proliferation // inferred …	0005634 // nucleus // inferred from electronic annotation	0003677 // DNA binding // inferred from electronic annotation /// 0003700 // transcription factor activity // inferred from electronic annotation /// 0030528 // transcription regulator activity // inferred from electronic annotation /// 0043565 // sequence-specific DNA binding // inferred from electronic annotation	chr7:27113151-27114062 (-) // 92.04 // p15.2
209318_x_at	pleiomorphic adenoma gene-like 1	PLAGL1	3.60316	1	1.25865e-13	5325	0006350 // transcription // inferred from electronic annotation /// 0006355 // regulation of transcription, DNA-dependent // inferred from electronic annotation /// 0006917 // induction of apoptosis // traceable author statement /// 0007050 // cell cycle arrest // traceable author statement /// 0045944 // positive regulation of transcription from RNA polymerase II promoter // inferred from direct…	0005622 // intracellular // inferred from electronic annotation /// 0005634 // nucleus // inferred from electronic annotation	0003676 // nucleic acid binding // inferred from electronic annotation /// 0003677 // DNA binding // inferred from direct assay /// 0003677 // DNA binding // inferred from electronic annotation /// 0008270 // zinc ion binding // inferred from electronic annotation /// 0046872 // metal ion binding // inferred from electronic annotation	chr6:144302842-144371045 (-) // 91.99 // q24.2
205430_at	bone morphogenetic protein 5	BMP5	2.877	1	4.58357e-13	653	0001501 // skeletal system development // inferred from electronic annotation /// 0001501 // skeletal system development // non-traceable author statement /// 0001503 // ossification // inferred from electronic annotation /// 0007275 // multicellular organismal development // inferred from electronic annotation /// 0007389 // pattern specification process // inferred from electronic annotation //…	0005576 // extracellular region // inferred from electronic annotation /// 0005615 // extracellular space // inferred from electronic annotation	0005125 // cytokine activity // non-traceable author statement /// 0005125 // cytokine activity // inferred from electronic annotation /// 0005515 // protein binding // inferred from electronic annotation /// 0008083 // growth factor activity // inferred from electronic annotation	chr6:55726401-55848347 (-) // 98.09 // p12.1
236395_at			2.24948	1	4.53833e-12					chr5:88207656-88208193 (-) // 94.29 // q14.3
205366_s_at	homeobox B6	HOXB6	3.59077	1	5.56681e-12	3216	0006350 // transcription // inferred from electronic annotation /// 0006355 // regulation of transcription, DNA-dependent // non-traceable author statement /// 0006355 // regulation of transcription, DNA-dependent // inferred from electronic annotation /// 0007275 // multicellular organismal development // inferred from electronic annotation /// 0008595 // determination of anterior/posterior axis…	0005634 // nucleus // non-traceable author statement /// 0005634 // nucleus // inferred from electronic annotation	0003677 // DNA binding // inferred from electronic annotation /// 0003700 // transcription factor activity // non-traceable author statement /// 0003700 // transcription factor activity // inferred from electronic annotation /// 0030528 // transcription regulator activity // inferred from electronic annotation /// 0043565 // sequence-specific DNA binding // inferred from electronic annotation	chr17:44028111-44030511 (-) // 93.56 // q21.32
205290_s_at	bone morphogenetic protein 2	BMP2	2.77085	1	3.97208e-11	650	0001501 // skeletal system development // traceable author statement /// 0001503 // ossification // inferred from electronic annotation /// 0001649 // osteoblast differentiation // inferred from direct assay /// 0001649 // osteoblast differentiation // inferred from electronic annotation /// 0001658 // ureteric bud branching // inferred from electronic annotation /// 0001837 // epithelial to mese…	0005576 // extracellular region // not recorded /// 0005576 // extracellular region // inferred from electronic annotation /// 0005615 // extracellular space // inferred from electronic annotation	0005102 // receptor binding // traceable author statement /// 0005125 // cytokine activity // inferred from electronic annotation /// 0005515 // protein binding // inferred from electronic annotation /// 0005515 // protein binding // inferred from physical interaction /// 0008083 // growth factor activity // inferred from electronic annotation /// 0016566 // specific transcriptional repressor act…	chr20:6697206-6707769 (+) // 98.77 // p12.3
232882_at			2.87532	1	3.48196e-10					chr13:40068094-40069344 (-) // 36.6 // q14.11
213342_at	Yes-associated protein 1, 65kDa	YAP1	2.67736	1	5.3857e-10	10413	0045944 // positive regulation of transcription from RNA polymerase II promoter // inferred from electronic annotation	0005667 // transcription factor complex // inferred from electronic annotation	0003713 // transcription coactivator activity // inferred from electronic annotation /// 0005515 // protein binding // inferred from physical interaction /// 0005515 // protein binding // inferred from electronic annotation /// 0005515 // protein binding // traceable author statement /// 0016563 // transcription activator activity // inferred from electronic annotation	chr11:101486406-101606876 (+) // 91.26 // q22.1
213150_at	homeobox A10	HOXA10	3.15548	1	6.03148e-10	3206	0006350 // transcription // inferred from electronic annotation /// 0006355 // regulation of transcription, DNA-dependent // inferred from electronic annotation /// 0007275 // multicellular organismal development // traceable author statement /// 0007275 // multicellular organismal development // inferred from electronic annotation /// 0007283 // spermatogenesis // traceable author statement /// …	0005634 // nucleus // inferred from electronic annotation	0003677 // DNA binding // inferred from electronic annotation /// 0003700 // transcription factor activity // inferred from electronic annotation /// 0030528 // transcription regulator activity // inferred from electronic annotation /// 0043565 // sequence-specific DNA binding // inferred from electronic annotation	chr7:27176748-27180716 (-) // 95.91 // p15.2
210479_s_at	RAR-related orphan receptor A	RORA	2.86798	1	8.81084e-10	6095	0006350 // transcription // inferred from electronic annotation /// 0006355 // regulation of transcription, DNA-dependent // inferred from electronic annotation /// 0006809 // nitric oxide biosynthetic process // inferred from electronic annotation /// 0007165 // signal transduction // non-traceable author statement /// 0021702 // cerebellar Purkinje cell differentiation // inferred from electron…	0005634 // nucleus // inferred from electronic annotation	0003677 // DNA binding // inferred from electronic annotation /// 0003700 // transcription factor activity // inferred from direct assay /// 0003700 // transcription factor activity // inferred from electronic annotation /// 0003707 // steroid hormone receptor activity // inferred from electronic annotation /// 0004872 // receptor activity // inferred from electronic annotation /// 0004879 // lig…	chr15:58576900-58671930 (-) // 99.59 // q22.2
242558_at			2.29275	1	9.59663e-09					chr3:41230052-41230902 (+) // 78.7 // p22.1
202949_s_at	four and a half LIM domains 2	FHL2	2.49036	1	1.76344e-08	2274	0006350 // transcription // inferred from electronic annotation /// 0006355 // regulation of transcription, DNA-dependent // inferred from electronic annotation /// 0006357 // regulation of transcription from RNA polymerase II promoter // inferred from electronic annotation /// 0009725 // response to hormone stimulus // inferred from mutant phenotype /// 0030521 // androgen receptor signaling pat…	0005634 // nucleus // traceable author statement /// 0005634 // nucleus // inferred from direct assay /// 0005634 // nucleus // inferred from electronic annotation /// 0005737 // cytoplasm // inferred from electronic annotation /// 0005856 // cytoskeleton // inferred from direct assay /// 0005925 // focal adhesion // inferred from direct assay	0003713 // transcription coactivator activity // non-traceable author statement /// 0005515 // protein binding // inferred from physical interaction /// 0008270 // zinc ion binding // inferred from electronic annotation /// 0042802 // identical protein binding // inferred from physical interaction /// 0046872 // metal ion binding // inferred from electronic annotation /// 0050681 // androgen rece…	chr2:105343716-105421384 (-) // 99.93 // q12.2
218959_at	homeobox C10	HOXC10	4.54103	1	2.82896e-08	3226	0001501 // skeletal system development // inferred from electronic annotation /// 0006350 // transcription // inferred from electronic annotation /// 0006355 // regulation of transcription, DNA-dependent // inferred from electronic annotation /// 0007275 // multicellular organismal development // inferred from electronic annotation /// 0008284 // positive regulation of cell proliferation // trace…	0005634 // nucleus // inferred from electronic annotation /// 0019907 // cyclin-dependent protein kinase activating kinase holoenzyme complex // inferred from direct assay	0003677 // DNA binding // inferred from electronic annotation /// 0003700 // transcription factor activity // inferred from electronic annotation /// 0003702 // RNA polymerase II transcription factor activity // traceable author statement /// 0030528 // transcription regulator activity // inferred from electronic annotation /// 0043565 // sequence-specific DNA binding // inferred from electronic …	chr12:52665310-52670320 (+) // 96.04 // q13.13
229327_s_at			2.56585	1	4.05992e-08					chr16:78188721-78189853 (+) // 94.61 // q23.1
239448_at			2.2536	0.999999	4.77906e-08					chr15:65186112-65186545 (+) // 77.53 // q22.33
223283_s_at	teashirt zinc finger homeobox 1	TSHZ1	2.37685	0.999999	8.21887e-08	10194	0006350 // transcription // inferred from electronic annotation /// 0006355 // regulation of transcription, DNA-dependent // inferred from electronic annotation /// 0007275 // multicellular organismal development // inferred from electronic annotation	0005622 // intracellular // inferred from electronic annotation /// 0005634 // nucleus // inferred from electronic annotation /// 0005634 // nucleus // inferred from direct assay /// 0005730 // nucleolus // inferred from direct assay	0003677 // DNA binding // inferred from electronic annotation /// 0003700 // transcription factor activity // inferred from electronic annotation /// 0008270 // zinc ion binding // inferred from electronic annotation /// 0043565 // sequence-specific DNA binding // inferred from electronic annotation /// 0046872 // metal ion binding // inferred from electronic annotation	chr18:71127164-71130014 (+) // 97.4 // q22.3
205601_s_at	homeobox B5	HOXB5	2.78533	0.999999	1.34808e-07	3215	0006350 // transcription // inferred from electronic annotation /// 0006355 // regulation of transcription, DNA-dependent // inferred from electronic annotation /// 0007275 // multicellular organismal development // inferred from electronic annotation /// 0009653 // anatomical structure morphogenesis // traceable author statement /// 0009952 // anterior/posterior pattern formation // inferred fro…	0005634 // nucleus // inferred from electronic annotation	0003677 // DNA binding // inferred from electronic annotation /// 0003700 // transcription factor activity // inferred from electronic annotation /// 0030528 // transcription regulator activity // inferred from electronic annotation /// 0043565 // sequence-specific DNA binding // inferred from electronic annotation	chr17:44023618-44026322 (-) // 97.94 // q21.32
204778_x_at	homeobox B7	HOXB7	2.55478	0.999996	2.5936e-07	3217	0006350 // transcription // inferred from electronic annotation /// 0006355 // regulation of transcription, DNA-dependent // non-traceable author statement /// 0006355 // regulation of transcription, DNA-dependent // inferred from electronic annotation /// 0007275 // multicellular organismal development // non-traceable author statement /// 0007275 // multicellular organismal development // infer…	0005634 // nucleus // non-traceable author statement /// 0005634 // nucleus // inferred from electronic annotation	0003677 // DNA binding // inferred from electronic annotation /// 0003700 // transcription factor activity // non-traceable author statement /// 0003700 // transcription factor activity // inferred from electronic annotation /// 0005515 // protein binding // inferred from physical interaction /// 0005515 // protein binding // inferred from electronic annotation /// 0030528 // transcription regula…	chr17:44039592-44043365 (-) // 89.12 // q21.32
239296_at			2.40552	0.999966	3.23696e-06					chr2:144967069-144967640 (-) // 59.93 // q22.3
201693_s_at	early growth response 1	EGR1	1.78441	0.999957	4.02279e-06	1958	0000122 // negative regulation of transcription from RNA polymerase II promoter // inferred from electronic annotation /// 0006350 // transcription // inferred from electronic annotation /// 0006355 // regulation of transcription, DNA-dependent // inferred from electronic annotation /// 0007611 // learning or memory // inferred from electronic annotation /// 0030217 // T cell differentiation // i…	0005622 // intracellular // inferred from electronic annotation /// 0005634 // nucleus // inferred from direct assay /// 0005634 // nucleus // inferred from electronic annotation	0003676 // nucleic acid binding // inferred from electronic annotation /// 0003677 // DNA binding // inferred from direct assay /// 0003677 // DNA binding // inferred from electronic annotation /// 0003700 // transcription factor activity // inferred from direct assay /// 0003700 // transcription factor activity // inferred from electronic annotation /// 0008270 // zinc ion binding // inferred fr…	chr5:137829066-137832891 (+) // 90.3 // q31.2
235739_at			2.02876	0.999908	8.022e-06					chr2:156893335-156893931 (-) // 93.62 // q24.1
1560798_at			2.23866	0.999864	1.16718e-05
1560798_AT			2.24	0.000135501	1.17e-05	NA
1560798_AT			2.24	0.000135501	1.17e-05
201464_X_AT	jun oncogene	JUN	2.36	0.00014925	1.35e-05	3725	0006350 // transcription // inferred from electronic annotation /// 0006355 // regulation of transcription, DNA-dependent // inferred from electronic annotation /// 0007179 // transforming growth factor beta receptor signaling pathway // inferred from direct assay /// 0007184 // SMAD protein nuclear translocation // inferred from direct assay /// 0009987 // cellular process // inferred from elect…	0000228 // nuclear chromosome // traceable author statement /// 0005634 // nucleus // inferred from electronic annotation /// 0005667 // transcription factor complex // inferred from electronic annotation /// 0005829 // cytosol // not recorded	0003677 // DNA binding // inferred from electronic annotation /// 0003677 // DNA binding // traceable author statement /// 0003700 // transcription factor activity // traceable author statement /// 0003700 // transcription factor activity // inferred from direct assay /// 0003700 // transcription factor activity // inferred from electronic annotation /// 0003702 // RNA polymerase II transcription…	chr1:59018953-59022321 (-) // 98.8 // p32.1
201464_x_at	jun oncogene	JUN	2.36153	0.999851	1.35319e-05	3725	0006350 // transcription // inferred from electronic annotation /// 0006355 // regulation of transcription, DNA-dependent // inferred from electronic annotation /// 0007179 // transforming growth factor beta receptor signaling pathway // inferred from direct assay /// 0007184 // SMAD protein nuclear translocation // inferred from direct assay /// 0009987 // cellular process // inferred from elect…	0000228 // nuclear chromosome // traceable author statement /// 0005634 // nucleus // inferred from electronic annotation /// 0005667 // transcription factor complex // inferred from electronic annotation /// 0005829 // cytosol // not recorded	0003677 // DNA binding // inferred from electronic annotation /// 0003677 // DNA binding // traceable author statement /// 0003700 // transcription factor activity // traceable author statement /// 0003700 // transcription factor activity // inferred from direct assay /// 0003700 // transcription factor activity // inferred from electronic annotation /// 0003702 // RNA polymerase II transcription…	chr1:59018953-59022321 (-) // 98.8 // p32.1
229667_s_at	homeobox B8	HOXB8	6.23383	0.999822	1.83968e-05	3218	0006350 // transcription // inferred from electronic annotation /// 0006355 // regulation of transcription, DNA-dependent // non-traceable author statement /// 0006355 // regulation of transcription, DNA-dependent // inferred from electronic annotation /// 0007275 // multicellular organismal development // non-traceable author statement /// 0007275 // multicellular organismal development // infer…	0005634 // nucleus // non-traceable author statement /// 0005634 // nucleus // inferred from electronic annotation	0003677 // DNA binding // inferred from electronic annotation /// 0003700 // transcription factor activity // non-traceable author statement /// 0003700 // transcription factor activity // inferred from electronic annotation /// 0030528 // transcription regulator activity // inferred from electronic annotation /// 0043565 // sequence-specific DNA binding // inferred from electronic annotation	chr17:44044711-44045200 (-) // 84.42 // q21.32
229667_S_AT	homeobox B8	HOXB8	6.23	0.000177612	1.84e-05	3218	0006350 // transcription // inferred from electronic annotation /// 0006355 // regulation of transcription, DNA-dependent // non-traceable author statement /// 0006355 // regulation of transcription, DNA-dependent // inferred from electronic annotation /// 0007275 // multicellular organismal development // non-traceable author statement /// 0007275 // multicellular organismal development // infer…	0005634 // nucleus // non-traceable author statement /// 0005634 // nucleus // inferred from electronic annotation	0003677 // DNA binding // inferred from electronic annotation /// 0003700 // transcription factor activity // non-traceable author statement /// 0003700 // transcription factor activity // inferred from electronic annotation /// 0030528 // transcription regulator activity // inferred from electronic annotation /// 0043565 // sequence-specific DNA binding // inferred from electronic annotation	chr17:44044711-44045200 (-) // 84.42 // q21.32
224606_at	Kruppel-like factor 6	KLF6	2.16809	0.999648	3.31537e-05	1316	0006350 // transcription // inferred from electronic annotation /// 0006355 // regulation of transcription, DNA-dependent // non-traceable author statement /// 0006355 // regulation of transcription, DNA-dependent // inferred from electronic annotation /// 0016049 // cell growth // non-traceable author statement /// 0019221 // cytokine-mediated signaling pathway // inferred from electronic annota…	0005622 // intracellular // inferred from electronic annotation /// 0005634 // nucleus // traceable author statement /// 0005634 // nucleus // inferred from electronic annotation /// 0005737 // cytoplasm // inferred from electronic annotation	0003676 // nucleic acid binding // inferred from electronic annotation /// 0003677 // DNA binding // inferred from electronic annotation /// 0008270 // zinc ion binding // inferred from electronic annotation /// 0016563 // transcription activator activity // traceable author statement /// 0046872 // metal ion binding // inferred from electronic annotation	chr10:3808745-3811306 (-) // 90.64 // p15.1
224606_AT	Kruppel-like factor 6	KLF6	2.17	0.000352327	3.32e-05	1316	0006350 // transcription // inferred from electronic annotation /// 0006355 // regulation of transcription, DNA-dependent // non-traceable author statement /// 0006355 // regulation of transcription, DNA-dependent // inferred from electronic annotation /// 0016049 // cell growth // non-traceable author statement /// 0019221 // cytokine-mediated signaling pathway // inferred from electronic annota…	0005622 // intracellular // inferred from electronic annotation /// 0005634 // nucleus // traceable author statement /// 0005634 // nucleus // inferred from electronic annotation /// 0005737 // cytoplasm // inferred from electronic annotation	0003676 // nucleic acid binding // inferred from electronic annotation /// 0003677 // DNA binding // inferred from electronic annotation /// 0008270 // zinc ion binding // inferred from electronic annotation /// 0016563 // transcription activator activity // traceable author statement /// 0046872 // metal ion binding // inferred from electronic annotation	chr10:3808745-3811306 (-) // 90.64 // p15.1
222303_AT			2.19	0.000394406	4.03e-05	NA				chr21:39104255-39104994 (+) // 85.21 // q22.2
222303_AT			2.19	0.000394406	4.03e-05					chr21:39104255-39104994 (+) // 85.21 // q22.2
222303_at			2.19016	0.999606	4.03426e-05					chr21:39104255-39104994 (+) // 85.21 // q22.2
209121_x_at	nuclear receptor subfamily 2, group F, member 2	NR2F2	2.34139	0.999502	4.55868e-05	7026	0006350 // transcription // inferred from electronic annotation /// 0006355 // regulation of transcription, DNA-dependent // inferred from electronic annotation /// 0006357 // regulation of transcription from RNA polymerase II promoter // traceable author statement /// 0006629 // lipid metabolic process // traceable author statement /// 0007165 // signal transduction // traceable author statement	0005634 // nucleus // traceable author statement /// 0005634 // nucleus // inferred from electronic annotation	0003677 // DNA binding // inferred from electronic annotation /// 0003700 // transcription factor activity // inferred from electronic annotation /// 0003706 // ligand-regulated transcription factor activity // traceable author statement /// 0003707 // steroid hormone receptor activity // inferred from electronic annotation /// 0003714 // transcription corepressor activity // traceable author sta…	chr15:94675996-94682008 (+) // 91.67 // q26.2
209121_X_AT	nuclear receptor subfamily 2, group F, member 2	NR2F2	2.34	0.000497862	4.56e-05	7026	0006350 // transcription // inferred from electronic annotation /// 0006355 // regulation of transcription, DNA-dependent // inferred from electronic annotation /// 0006357 // regulation of transcription from RNA polymerase II promoter // traceable author statement /// 0006629 // lipid metabolic process // traceable author statement /// 0007165 // signal transduction // traceable author statement	0005634 // nucleus // traceable author statement /// 0005634 // nucleus // inferred from electronic annotation	0003677 // DNA binding // inferred from electronic annotation /// 0003700 // transcription factor activity // inferred from electronic annotation /// 0003706 // ligand-regulated transcription factor activity // traceable author statement /// 0003707 // steroid hormone receptor activity // inferred from electronic annotation /// 0003714 // transcription corepressor activity // traceable author sta…	chr15:94675996-94682008 (+) // 91.67 // q26.2
214651_S_AT	homeobox A9	HOXA9	3.71	0.000693884	7.26e-05	3205	0006350 // transcription // inferred from electronic annotation /// 0006355 // regulation of transcription, DNA-dependent // inferred from electronic annotation /// 0007275 // multicellular organismal development // traceable author statement /// 0007275 // multicellular organismal development // inferred from electronic annotation /// 0009952 // anterior/posterior pattern formation // inferred f…	0005634 // nucleus // inferred from electronic annotation /// 0005634 // nucleus // non-traceable author statement /// 0005634 // nucleus // inferred from direct assay /// 0005667 // transcription factor complex // inferred from electronic annotation /// 0005737 // cytoplasm // inferred from electronic annotation	0003677 // DNA binding // inferred from electronic annotation /// 0003700 // transcription factor activity // inferred from electronic annotation /// 0005515 // protein binding // inferred from physical interaction /// 0005515 // protein binding // inferred from electronic annotation /// 0016563 // transcription activator activity // inferred from electronic annotation /// 0030528 // transcriptio…	chr7:27168744-27175794 (-) // 94.7 // p15.2
214651_s_at	homeobox A9	HOXA9	3.70622	0.999306	7.26432e-05	3205	0006350 // transcription // inferred from electronic annotation /// 0006355 // regulation of transcription, DNA-dependent // inferred from electronic annotation /// 0007275 // multicellular organismal development // traceable author statement /// 0007275 // multicellular organismal development // inferred from electronic annotation /// 0009952 // anterior/posterior pattern formation // inferred f…	0005634 // nucleus // inferred from electronic annotation /// 0005634 // nucleus // non-traceable author statement /// 0005634 // nucleus // inferred from direct assay /// 0005667 // transcription factor complex // inferred from electronic annotation /// 0005737 // cytoplasm // inferred from electronic annotation	0003677 // DNA binding // inferred from electronic annotation /// 0003700 // transcription factor activity // inferred from electronic annotation /// 0005515 // protein binding // inferred from physical interaction /// 0005515 // protein binding // inferred from electronic annotation /// 0016563 // transcription activator activity // inferred from electronic annotation /// 0030528 // transcriptio…	chr7:27168744-27175794 (-) // 94.7 // p15.2
241824_AT			2.24	0.00100889	0.000110133					chr2:28473168-28473599 (+) // 81.86 // p23.2
241926_S_AT	v-ets erythroblastosis virus E26 oncogene homolog (avian)	ERG	1.93	0.00124137	0.00013939	2078	0006350 // transcription // inferred from electronic annotation /// 0006355 // regulation of transcription, DNA-dependent // inferred from electronic annotation /// 0006468 // protein amino acid phosphorylation // traceable author statement /// 0007165 // signal transduction // traceable author statement /// 0007275 // multicellular organismal development // traceable author statement /// 0008283…	0005634 // nucleus // traceable author statement /// 0005634 // nucleus // inferred from electronic annotation	0003677 // DNA binding // inferred from electronic annotation /// 0003677 // DNA binding // traceable author statement /// 0003700 // transcription factor activity // inferred from electronic annotation /// 0004871 // signal transducer activity // traceable author statement /// 0005515 // protein binding // inferred from physical interaction /// 0005515 // protein binding // inferred from electro…	chr21:38676592-38677215 (-) // 99.52 // q22.2
236907_AT			1.83	0.00248197	0.000244214					chr8:101800806-101801284 (-) // 100.0 // q22.3
223502_S_AT	tumor necrosis factor (ligand) superfamily, member 13b	TNFSF13B	1.43	0.0028575	0.000302647	10673	0001782 // B cell homeostasis // inferred from electronic annotation /// 0002636 // positive regulation of germinal center formation // inferred from electronic annotation /// 0006955 // immune response // inferred from electronic annotation /// 0007165 // signal transduction // traceable author statement /// 0008283 // cell proliferation // traceable author statement /// 0008284 // positive regu…	0005576 // extracellular region // inferred from electronic annotation /// 0005615 // extracellular space // inferred from electronic annotation /// 0005625 // soluble fraction // traceable author statement /// 0005886 // plasma membrane // inferred from electronic annotation /// 0016020 // membrane // inferred from electronic annotation /// 0016021 // integral to membrane // inferred from electr…	0005102 // receptor binding // traceable author statement /// 0005125 // cytokine activity // inferred from electronic annotation /// 0005164 // tumor necrosis factor receptor binding // inferred from electronic annotation /// 0005515 // protein binding // inferred from physical interaction	chr13:107720100-107757365 (+) // 98.09 // q33.3
201531_AT	zinc finger protein 36, C3H type, homolog (mouse)	ZFP36	3.06	0.00299801	0.000311543	7538	0000288 // nuclear-transcribed mRNA catabolic process, deadenylation-dependent decay // inferred from electronic annotation /// 0000289 // nuclear-transcribed mRNA poly(A) tail shortening // inferred from electronic annotation /// 0006402 // mRNA catabolic process // inferred from direct assay /// 0006402 // mRNA catabolic process // traceable author statement /// 0007243 // protein kinase cascad…	0005634 // nucleus // inferred from electronic annotation /// 0005634 // nucleus // inferred from direct assay /// 0005737 // cytoplasm // traceable author statement /// 0005737 // cytoplasm // inferred from electronic annotation /// 0005829 // cytosol // inferred from direct assay /// 0005829 // cytosol // inferred from electronic annotation	0003676 // nucleic acid binding // inferred from electronic annotation /// 0003677 // DNA binding // inferred from electronic annotation /// 0003727 // single-stranded RNA binding // traceable author statement /// 0003729 // mRNA binding // inferred from direct assay /// 0003729 // mRNA binding // inferred from electronic annotation /// 0005515 // protein binding // inferred from physical interac…	chr19:44589326-44591885 (+) // 98.28 // q13.2
216109_AT	Mediator complex subunit 13-like	MED13L	1.51	0.00340748	0.000358441	23389	0006350 // transcription // inferred from electronic annotation /// 0006355 // regulation of transcription, DNA-dependent // inferred from electronic annotation /// 0006357 // regulation of transcription from RNA polymerase II promoter // inferred from electronic annotation	0000119 // mediator complex // inferred from electronic annotation /// 0005634 // nucleus // inferred from electronic annotation	0016455 // RNA polymerase II transcription mediator activity // inferred from electronic annotation	chr12:114900531-114903492 (-) // 73.21 // q24.21
236896_at	Zic family member 1 (odd-paired homolog, Drosophila)	ZIC1	1.44962	0.995858	0.000411603	7545	0007275 // multicellular organismal development // inferred from electronic annotation /// 0007389 // pattern specification process // inferred from sequence or structural similarity /// 0007389 // pattern specification process // inferred from electronic annotation /// 0007399 // nervous system development // inferred from electronic annotation /// 0007417 // central nervous system development /…	0005622 // intracellular // inferred from electronic annotation /// 0005634 // nucleus // inferred from direct assay /// 0005634 // nucleus // inferred from electronic annotation /// 0005737 // cytoplasm // inferred from direct assay	0003676 // nucleic acid binding // inferred from electronic annotation /// 0003677 // DNA binding // inferred from electronic annotation /// 0003700 // transcription factor activity // traceable author statement /// 0005515 // protein binding // inferred from electronic annotation /// 0008270 // zinc ion binding // inferred from electronic annotation /// 0046872 // metal ion binding // inferred f…	chr3:148616266-148617192 (+) // 96.74 // q24
202820_AT	aryl hydrocarbon receptor	AHR	2.38	0.00430524	0.000424003	196	0006350 // transcription // inferred from electronic annotation /// 0006355 // regulation of transcription, DNA-dependent // inferred from electronic annotation /// 0006355 // regulation of transcription, DNA-dependent // inferred from direct assay /// 0006366 // transcription from RNA polymerase II promoter // inferred from direct assay /// 0006366 // transcription from RNA polymerase II promote…	0005634 // nucleus // inferred from direct assay /// 0005634 // nucleus // inferred from electronic annotation /// 0005737 // cytoplasm // inferred from electronic annotation	0003677 // DNA binding // inferred from electronic annotation /// 0003677 // DNA binding // traceable author statement /// 0003700 // transcription factor activity // inferred from direct assay /// 0003700 // transcription factor activity // non-traceable author statement /// 0004871 // signal transducer activity // inferred from electronic annotation /// 0004872 // receptor activity // inferred …	chr7:17304770-17351917 (+) // 92.45 // p21.1
202820_at	aryl hydrocarbon receptor	AHR	2.37581	0.995695	0.000424003	196	0006350 // transcription // inferred from electronic annotation /// 0006355 // regulation of transcription, DNA-dependent // inferred from electronic annotation /// 0006355 // regulation of transcription, DNA-dependent // inferred from direct assay /// 0006366 // transcription from RNA polymerase II promoter // inferred from direct assay /// 0006366 // transcription from RNA polymerase II promote…	0005634 // nucleus // inferred from direct assay /// 0005634 // nucleus // inferred from electronic annotation /// 0005737 // cytoplasm // inferred from electronic annotation	0003677 // DNA binding // inferred from electronic annotation /// 0003677 // DNA binding // traceable author statement /// 0003700 // transcription factor activity // inferred from direct assay /// 0003700 // transcription factor activity // non-traceable author statement /// 0004871 // signal transducer activity // inferred from electronic annotation /// 0004872 // receptor activity // inferred …	chr7:17304770-17351917 (+) // 92.45 // p21.1
208328_S_AT	myocyte enhancer factor 2A	MEF2A	1.77	0.00557232	0.000511626	4205	0006350 // transcription // inferred from electronic annotation /// 0006355 // regulation of transcription, DNA-dependent // inferred from electronic annotation /// 0006915 // apoptosis // inferred from electronic annotation /// 0007275 // multicellular organismal development // inferred from electronic annotation /// 0007399 // nervous system development // inferred from electronic annotation //…	0005634 // nucleus // traceable author statement /// 0005634 // nucleus // inferred from electronic annotation	0003677 // DNA binding // inferred from electronic annotation /// 0003700 // transcription factor activity // non-traceable author statement /// 0003700 // transcription factor activity // inferred from electronic annotation /// 0043565 // sequence-specific DNA binding // inferred from electronic annotation	chr15:97956184-98071524 (+) // 87.66 // q26.3
235593_AT	zinc finger E-box binding homeobox 2	ZEB2	1.61	0.00887083	0.000724896	9839	0006350 // transcription // inferred from electronic annotation /// 0006355 // regulation of transcription, DNA-dependent // inferred from electronic annotation /// 0007399 // nervous system development // non-traceable author statement /// 0016481 // negative regulation of transcription // inferred by curator /// 0045449 // regulation of transcription // inferred from electronic annotation	0005622 // intracellular // inferred from electronic annotation /// 0005634 // nucleus // inferred by curator /// 0005634 // nucleus // inferred from electronic annotation	0003676 // nucleic acid binding // inferred from electronic annotation /// 0003677 // DNA binding // inferred from electronic annotation /// 0003700 // transcription factor activity // inferred from electronic annotation /// 0008270 // zinc ion binding // inferred from electronic annotation /// 0019208 // phosphatase regulator activity // non-traceable author statement /// 0043565 // sequence-spe…	chr2:144985425-144986435 (-) // 99.21 // q22.3
235593_at	zinc finger E-box binding homeobox 2	ZEB2	1.60917	0.991129	0.000724896	9839	0006350 // transcription // inferred from electronic annotation /// 0006355 // regulation of transcription, DNA-dependent // inferred from electronic annotation /// 0007399 // nervous system development // non-traceable author statement /// 0016481 // negative regulation of transcription // inferred by curator /// 0045449 // regulation of transcription // inferred from electronic annotation	0005622 // intracellular // inferred from electronic annotation /// 0005634 // nucleus // inferred by curator /// 0005634 // nucleus // inferred from electronic annotation	0003676 // nucleic acid binding // inferred from electronic annotation /// 0003677 // DNA binding // inferred from electronic annotation /// 0003700 // transcription factor activity // inferred from electronic annotation /// 0008270 // zinc ion binding // inferred from electronic annotation /// 0019208 // phosphatase regulator activity // non-traceable author statement /// 0043565 // sequence-spe…	chr2:144985425-144986435 (-) // 99.21 // q22.3
213147_at	homeobox A10	HOXA10	1.77278	0.990932	0.000750026	3206	0006350 // transcription // inferred from electronic annotation /// 0006355 // regulation of transcription, DNA-dependent // inferred from electronic annotation /// 0007275 // multicellular organismal development // traceable author statement /// 0007275 // multicellular organismal development // inferred from electronic annotation /// 0007283 // spermatogenesis // traceable author statement /// …	0005634 // nucleus // inferred from electronic annotation	0003677 // DNA binding // inferred from electronic annotation /// 0003700 // transcription factor activity // inferred from electronic annotation /// 0030528 // transcription regulator activity // inferred from electronic annotation /// 0043565 // sequence-specific DNA binding // inferred from electronic annotation	chr7:27176748-27180716 (-) // 95.91 // p15.2
213147_AT	homeobox A10	HOXA10	1.77	0.00906797	0.000750026	3206	0006350 // transcription // inferred from electronic annotation /// 0006355 // regulation of transcription, DNA-dependent // inferred from electronic annotation /// 0007275 // multicellular organismal development // traceable author statement /// 0007275 // multicellular organismal development // inferred from electronic annotation /// 0007283 // spermatogenesis // traceable author statement /// …	0005634 // nucleus // inferred from electronic annotation	0003677 // DNA binding // inferred from electronic annotation /// 0003700 // transcription factor activity // inferred from electronic annotation /// 0030528 // transcription regulator activity // inferred from electronic annotation /// 0043565 // sequence-specific DNA binding // inferred from electronic annotation	chr7:27176748-27180716 (-) // 95.91 // p15.2
202957_AT	hematopoietic cell-specific Lyn substrate 1	HCLS1	1.87	0.0104071	0.000889409	3059	0006355 // regulation of transcription, DNA-dependent // traceable author statement /// 0007242 // intracellular signaling cascade // traceable author statement /// 0008284 // positive regulation of cell proliferation // inferred from sequence or structural similarity /// 0008284 // positive regulation of cell proliferation // inferred from electronic annotation /// 0009725 // response to hormone…	0005634 // nucleus // inferred from sequence or structural similarity /// 0005634 // nucleus // inferred from electronic annotation /// 0005665 // DNA-directed RNA polymerase II, core complex // traceable author statement /// 0005737 // cytoplasm // inferred from sequence or structural similarity /// 0005737 // cytoplasm // inferred from electronic annotation /// 0005739 // mitochondrion // infer…	0003677 // DNA binding // traceable author statement /// 0003700 // transcription factor activity // traceable author statement /// 0005515 // protein binding // inferred from sequence or structural similarity /// 0005515 // protein binding // inferred from electronic annotation /// 0017124 // SH3 domain binding // inferred from electronic annotation	chr3:122832935-122862768 (-) // 95.38 // q13.33
